# Supplementary material
Source: PubMed Central journal article supplement (PMC9198754)
Supplement: jama-e227672-s001.pdf [file jama-e227672-s001.pdf]

## Supplemental Online Content

Kerlikowske K, Su Y-R, Sprague BL, et al. Association of screening with digital breast tomosynthesis vs digital mammography with risk of interval invasive and advanced breast cancer. *JAMA*. doi:10.1001/jama.2022.7672

### eMethods

#### **Absolute difference in screening outcome**

#### **Evaluation of propensity model**

**eFigure.** Propensity scores for digital mammography and digital breast tomosynthesis examinations

#### **Multiple imputation of tumor characteristics for calculation of advanced cancer as defined by Tomosynthesis Mammographic Imaging Screening Trial (TMIST)**

**eTable 1.** Summary of variables used to impute tumor characteristics used to calculate TMIST

### eReferences

**eTable 2.** Outcomes from screening with digital breast tomosynthesis vs. digital mammography

**eTable 3.** Rate of screening benefits and failures by breast density for digital breast tomosynthesis vs digital mammography

**eTable 4.** Rate of screening false-alarms by breast density for digital breast tomosynthesis vs. digital mammography

**eTable 5.** Rate of screening benefits and failures by breast density for digital mammography and digital breast tomosynthesis

**eTable 6.** Rate of screening harms by breast density and BCSC 5-year risk for digital breast tomosynthesis vs. digital mammography

This supplemental material has been provided by the authors to give readers additional information about their work.

## eMethods

### Absolute difference in screening outcome

The absolute difference ( $AD$ ) in each screening outcome is defined as the absolute difference in their rate per 1000 exams by modality,  $R_{DBT}$  for digital breast tomosynthesis (DBT) and  $R_{DM}$  for digital mammography, respectively. Under a log-binomial regression,

$$\log(\text{outcome rate} \mid \text{modality}) = \alpha + \beta I(\text{modality}=\text{DBT}),$$

the absolute difference can be expressed as following:

$$AD = R_{DBT} - R_{DM} = e^{\alpha+\beta} - e^{\alpha}.$$

Using SAS PROC GENMOD with an independent working correlation, we obtained  $\hat{\alpha}$  and  $\hat{\beta}$ , the estimates of  $\alpha$  and  $\beta$ , and their estimated variance-covariance matrix. We then estimated  $AD$  by  $\widehat{AD} = e^{\hat{\alpha}+\hat{\beta}} - e^{\hat{\alpha}}$ . Denote the true value of  $\alpha$  and  $\beta$  as  $\alpha_0$  and  $\beta_0$ . The variance of  $\widehat{AD}$  was approximated using delta method as shown below:

$$\begin{aligned} \text{var}(\widehat{AD}) &\approx \text{var}[(e^{\alpha_0+\beta_0} - e^{\alpha_0})(\hat{\alpha} - \alpha_0) + e^{\alpha_0+\beta_0}(\hat{\beta} - \beta_0)] \\ &= (e^{\alpha_0+\beta_0} - e^{\alpha_0})^2 \text{var}(\hat{\alpha}) + (e^{\alpha_0+\beta_0})^2 \text{var}(\hat{\beta}) + 2e^{\alpha_0+\beta_0}(e^{\alpha_0+\beta_0} - e^{\alpha_0}) \text{cov}(\hat{\alpha}, \hat{\beta}) \\ &= [e^{\alpha_0+\beta_0} - e^{\alpha_0} \quad e^{\alpha_0+\beta_0}] \text{var} \begin{pmatrix} \hat{\alpha} \\ \hat{\beta} \end{pmatrix} \begin{bmatrix} e^{\alpha_0+\beta_0} - e^{\alpha_0} \\ e^{\alpha_0+\beta_0} \end{bmatrix}. \end{aligned}$$

We estimated the variance of  $\widehat{AD}$  by

$$s^2 = [e^{\hat{\alpha}+\hat{\beta}} - e^{\hat{\alpha}} \quad e^{\hat{\alpha}+\hat{\beta}}] \widehat{\text{var}} \begin{pmatrix} \hat{\alpha} \\ \hat{\beta} \end{pmatrix} \begin{bmatrix} e^{\hat{\alpha}+\hat{\beta}} - e^{\hat{\alpha}} \\ e^{\hat{\alpha}+\hat{\beta}} \end{bmatrix}.$$

The 95% confidence interval of  $\widehat{AD}$  was obtained by  $\widehat{AD} \pm 1.96 \times s$ .

## Evaluation of propensity model

We first visually examined the density of propensity scores for DBT vs. digital mammography examinations (eFigure 1). The density curves of propensity scores in DBT and digital mammography exams overlapped across a wide range, suggesting a common support of propensity scores in the two treatment groups. We also examined the standardized mean differences of covariates in the propensity model between the two treatment groups before and after weighting with the inverse probability (Table 1). Using a maximum of 25% standardized mean difference,<sup>3</sup> the distributions of these covariates were balanced between DBT and digital mammography exams after weighting.

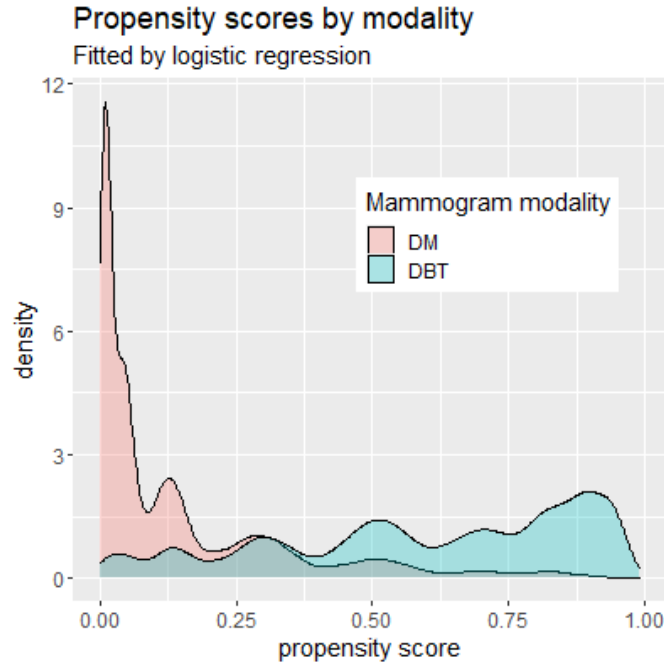

eFigure 1. Propensity scores for digital mammography and digital breast tomosynthesis examinations.

## Multiple imputation of tumor characteristics for calculation of advanced cancer as defined by Tomosynthesis Mammographic Imaging Screening Trial (TMIST)

We used multiple imputation by chained equation (MICE)<sup>1</sup> to impute missing values in components needed for deriving TMIST outcome, including 4.4% missing for primary tumor size, 2.2% for lymph nodes status, 3.7% for tumor grade, 7.8% for human epidermal growth factor receptor 2 (HER2), 2.0% for estrogen receptor (ER) and 2.1% for progesterone receptor (PR). These variables were multiply imputed simultaneously by SAS PROC MI using fully conditional specification (FCS). A detailed description of variables used in the multiple imputation are shown in eTable 2. We computed the rate of TMIST outcomes for DBT and digital mammography exams and the absolute risk differences between DBT vs. digital mammography using each imputed dataset. Estimates and 95% confidence intervals were combined and derived using Rubin's rule.<sup>2</sup>

**eTable 1: Summary of variables used to impute tumor characteristics used to calculate TMIST**

| Description                                  | Type       | Variable levels            | FCS        | Total N = 5,735 |           |
|----------------------------------------------|------------|----------------------------|------------|-----------------|-----------|
|                                              |            |                            |            | N Missing       | % Missing |
| Age at mammogram                             | Continuous | N/A                        | N/A        | 0               | 0         |
| Exam year                                    | Continuous | N/A                        | N/A        | 0               | 0         |
| BCSC Registry                                | Nominal    | 5                          | N/A        | 0               | 0         |
| Mammogram modality                           | Binary     | 2                          | N/A        | 0               | 0         |
| BI-RADS initial assessment                   | Binary     | 2                          | N/A        | 0               | 0         |
| BI-RADS final assessment                     | Binary     | 2                          | N/A        | 0               | 0         |
| Most severe benign biopsy result             | Ordinal    | 6                          | N/A        | 0               | 0         |
| Race/ethnicity                               | Nominal    | 5 + missing value category | N/A        | 0               | 0         |
| BI-RADS breast density category              | Ordinal    | 4 + missing value category | N/A        | 0               | 0         |
| First-degree family history of breast cancer | Binary     | 2 + missing value category | N/A        | 0               | 0         |
| Time since previous screening mammogram      | Ordinal    | 4 + missing value category | N/A        | 0               | 0         |
| Estrogen receptor status                     | Binary     | 2                          | logistic   | 108             | 1.88      |
| Progesterone receptor status                 | Binary     | 2                          | logistic   | 162             | 2.82      |
| Positive lymph nodes                         | Binary     | 2                          | logistic   | 168             | 2.93      |
| AJCC anatomic stage, 8 <sup>th</sup> edition | Ordinal    | 9                          | logistic   | 193             | 3.7       |
| Tumor grade                                  | Ordinal    | 3                          | logistic   | 232             | 4.05      |
| Natural log of tumor size                    | Continuous | N/A                        | regression | 244             | 4.25      |
| HER2 receptor status                         | Binary     | 2                          | logistic   | 452             | 7.88      |

Abbreviations: FCS, type of fully conditionally specified statement used in SAS PROC MI; American Joint Committee on Cancer (AJCC); Breast Imaging, Reporting, and Data System (BI-RADS); Tomosynthesis Mammographic Imaging Screening Trial (TMIST)

### eReferences

1. White IR, Royston P. Imputing missing covariate values for the Cox model. *Stat Med* 2009;28:1982–98.
2. Little, R. & Rubin, D. *Statistical Analysis with Missing Data* (John Wiley, New York, 2002).

| <b>eTable 2. Outcomes from screening with digital breast tomosynthesis vs. digital mammography</b> |                                                  |                                                  |                                        |
|----------------------------------------------------------------------------------------------------|--------------------------------------------------|--------------------------------------------------|----------------------------------------|
|                                                                                                    | <b>Digital breast tomosynthesis<br/>N=374002</b> | <b>Digital mammography<br/>N=1003900</b>         |                                        |
| <b>Screening outcomes</b>                                                                          | <b>Rate per 1,000 exams (95% CI)<sup>a</sup></b> | <b>Rate per 1,000 exams (95% CI)<sup>a</sup></b> | <b>Difference (95% CI)<sup>a</sup></b> |
| <b>Screening benefit</b>                                                                           |                                                  |                                                  |                                        |
| Stage I screen-detected invasive cancer                                                            | 3.45<br>(3.06, 3.90)                             | 2.99<br>(2.78, 3.23)                             | 0.46<br>(-0.01, 0.93)                  |
| <b>Screening failures</b>                                                                          |                                                  |                                                  |                                        |
| Interval invasive cancer                                                                           | 0.57<br>(0.50, 0.65)                             | 0.61<br>(0.54, 0.68)                             | -0.04<br>(-0.14, 0.06)                 |
| Stage II or higher invasive cancer <sup>b</sup>                                                    | 0.36<br>(0.29, 0.44)                             | 0.45<br>(0.38, 0.53)                             | -0.09<br>(-0.18, -0.01)                |
| TMIST advanced cancer <sup>c</sup>                                                                 | 1.80<br>(1.19, 2.70)                             | 1.89<br>(1.66, 2.18)                             | -0.09<br>(-0.80, 0.62)                 |
| <b>Screening false-alarms</b>                                                                      |                                                  |                                                  |                                        |
| False-positive recall                                                                              | 66.2<br>(62.0, 70.7)                             | 83.4<br>(75.5, 92.2)                             | -17.2<br>(-25.2, -9.2)                 |
| False-positive short interval follow-up                                                            | 11.2<br>(8.9, 14.1)                              | 17.9<br>(14.1, 22.7)                             | -6.7<br>(-11.2, -2.2)                  |
| False-positive biopsy recommendation                                                               | 10.9<br>(10.1, 11.7)                             | 11.7<br>(9.8, 14.0)                              | -0.84<br>(-2.6, 0.87)                  |
| <b>Screening consequences</b>                                                                      |                                                  |                                                  |                                        |
| Screen-detected DCIS <sup>d</sup>                                                                  | 1.24<br>(1.07, 1.44)                             | 1.24<br>(1.03, 1.48)                             | 0.00<br>(-0.27, 0.27)                  |

<sup>a</sup>Based on log-binomial model fit via generalized estimating equations with inverse probability weighting

<sup>b</sup>American Joint Committee on Cancer (AJCC) 8<sup>th</sup> edition, prognostic stage II or higher

<sup>c</sup>Tomosynthesis Mammographic Imaging Screening Trial (TMIST) defined as 1) tumor  $\geq 20$  mm, or 2) tumor  $> 10$ mm and either HER2-positive or triple-negative, or 3) cancer that spread from the breast to at least one nearby lymph node or 4) cancer that spread from the breast to a distant organ

<sup>d</sup>Ductal carcinoma in situ

**eTable 3. Rate of screening benefits and failures by breast density for digital breast tomosynthesis vs digital mammography (DM)<sup>a</sup>**

|                                                             | SCREENING BENEFIT                          |                     |                      | SCREENING FAILURES       |                     |                       |                                                               |                     |                       |                                                         |                     |                       |
|-------------------------------------------------------------|--------------------------------------------|---------------------|----------------------|--------------------------|---------------------|-----------------------|---------------------------------------------------------------|---------------------|-----------------------|---------------------------------------------------------|---------------------|-----------------------|
|                                                             | Stage I<br>Screen-detected invasive cancer |                     |                      | Interval invasive cancer |                     |                       | Prognostic Stage II or higher<br>invasive cancer <sup>b</sup> |                     |                       | TMIST advanced breast cancer<br>definition <sup>c</sup> |                     |                       |
|                                                             | per<br>1,000 exams                         | Difference          |                      | per<br>1,000 exams       | Difference          |                       | per<br>1,000 exams                                            | Difference          |                       | per<br>1,000 exams                                      | Difference          |                       |
| Breast density<br>(DBT N /DM N)                             | (95% CI)                                   |                     |                      | (95% CI)                 |                     |                       | (95% CI)                                                      |                     |                       | (95% CI)                                                |                     |                       |
|                                                             | DBT                                        | DM                  | DBT vs.<br>DM        | DBT                      | DM                  | DBT vs.<br>DM         | DBT                                                           | DM                  | DBT vs.<br>DM         | DBT                                                     | DM                  | DBT vs.<br>DM         |
| Almost entirely<br>fatty<br>(39059/101842)                  | 2.39<br>(2.10,2.73)                        | 2.09<br>(1.71,2.55) | 0.30<br>(-0.22,0.82) | 0.12<br>(0.04,0.40)      | 0.24<br>(0.13,0.43) | -0.12<br>(-0.31,0.07) | 0.07<br>(0.02,0.29)                                           | 0.21<br>(0.13,0.33) | -0.14<br>(-0.28,0.00) | 1.14<br>(0.08,1.57)                                     | 0.98<br>(0.70,1.31) | 0.16<br>(-0.25,0.57)  |
| Scattered<br>fibroglandular<br>densities<br>(173534/428513) | 3.74<br>(3.54,3.94)                        | 3.30<br>(2.98,3.65) | 0.44<br>(0.07,0.81)  | 0.31<br>(0.20,0.48)      | 0.39<br>(0.33,0.47) | -0.08<br>(-0.24,0.07) | 0.46<br>(0.26,0.80)                                           | 0.41<br>(0.33,0.50) | 0.05<br>(-0.21,0.31)  | 1.54<br>(1.11,2.15)                                     | 1.75<br>(1.50,2.05) | -0.20<br>(-0.76,0.34) |
| Heterogeneously<br>dense<br>(127740/357811)                 | 3.54<br>(2.70,4.64)                        | 2.80<br>(2.41,3.26) | 0.74<br>(-0.22,1.71) | 0.99<br>(0.80,1.22)      | 0.87<br>(0.76,1.01) | 0.11<br>(-0.11,0.34)  | 0.33<br>(0.14,0.74)                                           | 0.51<br>(0.40,0.65) | -0.19<br>(-0.46,0.09) | 2.21<br>(1.26,3.88)                                     | 2.23<br>(1.86,2.68) | -0.02<br>(-1.21,1.16) |
| Extremely dense<br>(24361/70519)                            | 2.73<br>(2.37,3.14)                        | 2.37<br>(1.94,2.90) | 0.36<br>(-0.17,0.89) | 0.87<br>(0.59,1.27)      | 1.21<br>(0.93,1.58) | -0.34<br>(-0.76,0.07) | 0.42<br>(0.34,0.51)                                           | 0.59<br>(0.42,0.83) | -0.17<br>(-0.39,0.04) | 2.34<br>(1.94,2.83)                                     | 1.87<br>(1.52,2.31) | 0.47<br>(-0.05,0.99)  |

<sup>a</sup>Based on log-binomial model fit via generalized estimating equations with inverse probability weighting

<sup>b</sup>American Joint Committee on Cancer (AJCC) 8<sup>th</sup> ed. prognostic pathologic stage II or higher

<sup>c</sup>Tomosynthesis Mammographic Imaging Screening Trial (TMIST) defined as 1) tumor  $\geq 20$  mm, or 2) tumor  $> 10$ mm and either HER2-positive or triple-negative, or 3) cancer that spread from the breast to at least one nearby lymph node or 4) cancer that spread from the breast to a distant organ

**eTable 4. Rate of screening false-alarms by breast density for digital breast tomosynthesis vs. digital mammography (DM)<sup>a</sup>**

| Breast Density<br>(DBT N /DM N)                       | SCREENING FALSE-ALARMS |                     |                        |                                                        |                     |                      |                                      |                     |                      |
|-------------------------------------------------------|------------------------|---------------------|------------------------|--------------------------------------------------------|---------------------|----------------------|--------------------------------------|---------------------|----------------------|
|                                                       | False-positive recall  |                     |                        | False-positive short-interval follow-up recommendation |                     |                      | False-positive biopsy recommendation |                     |                      |
|                                                       | per 1,000 exams        |                     | Difference             | per 1,000 exams                                        |                     | Difference           | per 1,000 exams                      |                     | Difference           |
|                                                       | (95% CI)               |                     |                        | (95% CI)                                               |                     |                      | (95% CI)                             |                     |                      |
|                                                       | DBT                    | DM                  | DBT vs. DM             | DBT                                                    | DM                  | DBT vs. DM           | DBT                                  | DM                  | DBT vs. DM           |
| Almost entirely fatty<br>(39059/101842)               | 36.2<br>(33.6,38.0)    | 46.1<br>(38.7,54.0) | -9.9<br>(-17.1,-2.6)   | 6.5<br>(4.7,9.1)                                       | 10.4<br>(8.3,13.0)  | -3.9<br>(-6.9,-0.84) | 5.9<br>(5.3,6.6)                     | 8.0<br>(6.4,10.1)   | -2.1<br>(-3.9,-0.34) |
| Scattered fibroglandular densities<br>(173534/428513) | 56.8<br>(50.4,64.0)    | 79.6<br>(71.6,88.0) | -22.8<br>(-31.0,-14.6) | 9.8<br>(6.7,14.5)                                      | 17.8<br>(14.1,22.0) | -8.0<br>(-13.1,-2.9) | 8.4<br>(7.5,9.4)                     | 10.7<br>(9.0,12.5)  | -2.2<br>(-4.0,-0.82) |
| Heterogeneously dense<br>(127740/357811)              | 83.0<br>(75.3,91.0)    | 96.9<br>(83.7,112)  | -13.9<br>(-29.1, 1.3)  | 13.4<br>(10.4,16.0)                                    | 20.8<br>(16.4,26.0) | -7.4<br>(-12.5,-2.4) | 14.2<br>(12.8,15.0)                  | 12.7<br>(10.2,15.0) | 1.5<br>(-1.3,4.2)    |
| Extremely dense<br>(24361/70519)                      | 89.2<br>(83.1,95)      | 86.6<br>(78.5,95)   | 2.6<br>(-7.9,13)       | 16.5<br>(14.5,18.0)                                    | 16.5<br>(12.8,21.0) | 0.05<br>(-4.0,4.1)   | 16.7<br>(14.6,19.0)                  | 14.6<br>(12.3,17.0) | 2.1<br>(-5.5,5.6)    |

<sup>a</sup>Based on log-binomial model fit via generalized estimating equations with inverse probability weighting

**eTable 5. Rate of screening benefits and failures by breast density for digital mammography (DM) and digital breast tomosynthesis<sup>a</sup>**

| Breast density/BCSC 5-year risk <sup>d</sup> (DBT N /DM N) | SCREENING BENEFIT                       |                   |                    | SCREENING FAILURES       |                   |                    |                                                            |                  |                     |                                                      |                  |                     |
|------------------------------------------------------------|-----------------------------------------|-------------------|--------------------|--------------------------|-------------------|--------------------|------------------------------------------------------------|------------------|---------------------|------------------------------------------------------|------------------|---------------------|
|                                                            | Stage I Screen-detected invasive cancer |                   |                    | Interval invasive cancer |                   |                    | Prognostic Stage II or higher invasive cancer <sup>b</sup> |                  |                     | TMIST advanced breast cancer definition <sup>c</sup> |                  |                     |
|                                                            | per 1,000 exams                         |                   | Difference         | per 1,000 exams          |                   | Difference         | per 1,000 exams                                            |                  | Difference          | per 1,000 exams                                      |                  | Difference          |
|                                                            | (95% CI)                                |                   |                    | (95% CI)                 |                   |                    | (95% CI)                                                   |                  |                     | (95% CI)                                             |                  |                     |
|                                                            | DBT                                     | DM                | DBT vs. DM         | DBT                      | DM                | DBT vs. DM         | DBT                                                        | DM               | DBT vs. DM          | DBT                                                  | DM               | DBT vs. DM          |
| Almost entirely fatty                                      |                                         |                   |                    |                          |                   |                    |                                                            |                  |                     |                                                      |                  |                     |
| 0-<1.67% (33692/88143)                                     | 1.66 (1.25, 2.19)                       | 1.84 (1.48, 2.30) | -0.19 (-0.77,0.40) | 0.08 (0.02,0.30)         | 0.23 (0.12,0.46)  | -0.15 (-0.31,0.01) | 0.08 (0.02,0.33)                                           | 0.22 (0.14,0.36) | -0.14 (-0.30,0.01)  | 0.44 (0.11,1.70)                                     | 0.98 (0.72,1.34) | -0.54 (-1.18, 0.09) |
| ≥1.67% (27110/5427)                                        | 2.65 (1.03,6.83)                        | 3.87 (2.07, 7.25) | -1.22 (-4.60,2.16) | 0.95 (0.27,3.37)         | 0.42 (0.14,1.29)  | 0.53 (-0.78,1.85)  | NA                                                         | NA               | NA                  | 1.78 (0.51,6.25)                                     | 0.95 (0.39,2.32) | 0.82 (-1.53, 3.19)  |
| Scattered fibroglandular densities                         |                                         |                   |                    |                          |                   |                    |                                                            |                  |                     |                                                      |                  |                     |
| 0-<1.67% (117322/306387)                                   | 2.78 (2.49, 3.09)                       | 2.69 (2.43, 2.97) | 0.09 (-0.30,0.48)  | 0.24 (0.12,0.46)         | 0.28 (0.23, 0.34) | -0.04 (-0.21,0.13) | 0.35 (0.23, 0.51)                                          | 0.33 (0.25,0.45) | 0.02 (-0.13,0.16)   | 0.98 (0.66,1.45)                                     | 1.41 (1.18,1.67) | -0.42 (-0.86, 0.01) |
| ≥1.67% (45985/91383)                                       | 6.96 (6.15, 7.88)                       | 4.72 (4.07, 5.48) | 2.24 (1.17,3.32)   | 0.56 (0.41,0.78)         | 0.69 (0.51, 0.92) | -0.12 (-0.40,0.15) | 0.70 (0.28,1.73)                                           | 0.54 (0.39,0.75) | 0.16 (-0.51,0.83)   | 3.28 (2.26,4.76)                                     | 2.56 (2.08,3.15) | 0.72 (-0.52, 1.96)  |
| Heterogeneously dense                                      |                                         |                   |                    |                          |                   |                    |                                                            |                  |                     |                                                      |                  |                     |
| 0-<1.67% (56810/185489)                                    | 1.54 (0.97, 2.43)                       | 1.73 (1.46, 2.05) | -0.19 (-0.94,0.55) | 1.12 (0.69,1.82)         | 0.70 (0.58, 0.85) | 0.42 (-0.17,1.01)  | 0.27 (0.10,0.74)                                           | 0.39 (0.29,0.54) | -0.12 (-0.39,0.15)  | 1.39 (0.78,2.49)                                     | 1.50 (1.25,1.81) | -0.10 (-0.90, 0.69) |
| ≥1.67% (66180/156785)                                      | 5.50 (4.50, 6.72)                       | 3.78 (3.11, 4.60) | 1.72 (0.56,2.87)   | 0.86 (0.55,1.35)         | 1.03 (0.85, 1.24) | -0.17 (-0.62,0.28) | 0.41 (0.21,0.81)                                           | 0.61 (0.49,0.77) | -0.20 (-0.50,0.10)  | 3.29 (1.90,5.67)                                     | 2.88 (2.38,3.47) | 0.41 (-1.27, 2.09)  |
| Extremely dense                                            |                                         |                   |                    |                          |                   |                    |                                                            |                  |                     |                                                      |                  |                     |
| 0-<1.67% (10611/37796)                                     | 1.99 (1.43, 2.77)                       | 1.69 (1.25, 2.29) | 0.30 (-0.48,1.08)  | 0.93 (0.74,1.17)         | 1.07 (0.78, 1.46) | -0.13 (-0.49,0.22) | 0.54 (0.30,68)                                             | 0.42 (0.29,0.62) | 0.12 (-0.09,0.32)   | 2.55 (1.94,3.36)                                     | 1.66 (1.30,2.11) | 0.90 (0.14, 1.7)    |
| ≥1.67% (13291/31300)                                       | 3.28 (2.41, 4.45)                       | 2.98 (2.29, 3.87) | 0.30 (-0.87,1.47)  | 0.81 (0.37,1.76)         | 1.39 (1.01, 1.92) | -0.59 (-1.27,0.09) | 0.27 (0.14,0.52)                                           | 0.80 (0.49,1.31) | -0.53 (-0.97,-0.10) | 1.70 (0.98,2.95)                                     | 2.12 (1.55,2.91) | -0.42 (-1.43, 0.58) |

<sup>a</sup>Based on log-binomial model fit via generalized estimating equations with inverse probability weighting

<sup>b</sup>American Joint Committee on Cancer (AJCC) 8<sup>th</sup> ed. prognostic pathologic stage II or higher

<sup>c</sup>Tomosynthesis Mammographic Imaging Screening Trial (TMIST) defined as 1) tumor ≥20 mm, or 2) tumor >10mm and either HER2-positive or triple-negative, or 3) cancer that spread from the breast to at least one nearby lymph node or 4) cancer that spread from the breast to a distant organ

<sup>d</sup>Breast Cancer Surveillance Consortium (BCSC) 5-year risk calculated using age, race, first degree family history of breast cancer, history of breast biopsy, BI-RADS density



**eTable 6. Rate of screening harms by breast density and BCSC 5-year risk for digital breast tomosynthesis vs. digital mammography (DM)<sup>a</sup>**

| Breast density/BCSC 5-year risk <sup>b</sup><br>(DBT N /DM N) | SCREENING FALSE-ALARMS |                     |                        |                                                        |                      |                      |                                      |                     |                       |
|---------------------------------------------------------------|------------------------|---------------------|------------------------|--------------------------------------------------------|----------------------|----------------------|--------------------------------------|---------------------|-----------------------|
|                                                               | False-positive recall  |                     |                        | False-positive short-interval follow-up recommendation |                      |                      | False-positive biopsy recommendation |                     |                       |
|                                                               | per 1,000 exams        |                     | Difference             | per 1,000 exams                                        |                      | Difference           | per 1,000 exams                      |                     | Difference            |
|                                                               | (95% CI)               |                     |                        | (95% CI)                                               |                      |                      | (95% CI)                             |                     |                       |
|                                                               | DBT                    | DM                  | DBT vs. DM             | DBT                                                    | DM                   | DBT vs. DM           | DBT                                  | DM                  | DBT vs. DM            |
| Almost entirely fatty                                         |                        |                     |                        |                                                        |                      |                      |                                      |                     |                       |
| 0-<1.67%<br>(33692/88143)                                     | 35.9<br>(33.5,38.4)    | 46.2<br>(38.6,55.3) | -10.3<br>(-17.9, -2.7) | 6.5<br>(5.0,8.4)                                       | 10.4<br>(8.2,13.1)   | -3.9<br>(-6.6,-1.1)  | 6.2<br>(5.5,6.9)                     | 7.9<br>(6.3,10.0)   | -1.8<br>(-3.5, -0.10) |
| ≥1.67%<br>(2710/5427)                                         | 59.0<br>(45.8,76.0)    | 53.3<br>(46.1,61.6) | 5.7<br>(-10.9, 22.3)   | 7.6<br>(2.6,22.1)                                      | 11.7<br>(8.6,16.1)   | -4.2<br>(-13.5,5.1)  | 5.2<br>(1.6,16.4)                    | 10.4<br>(7.4,14.6)  | -5.2<br>(-11.8, 1.4)  |
| Scattered fibroglandular densities                            |                        |                     |                        |                                                        |                      |                      |                                      |                     |                       |
| 0-<1.67%<br>(117322/306387)                                   | 57.2<br>(50.3,65.0)    | 81.8<br>(73.6,90.8) | -24.6<br>(-33.4,-15.8) | 9.8<br>(6.6,14.6)                                      | 18.2<br>(14.5,22.8)  | -8.4<br>(-13.6,-3.2) | 7.8<br>(6.9,8.9)                     | 10.3<br>(8.7,12.1)  | -2.4<br>(-4.2, -0.69) |
| ≥1.67%<br>(45985/91383)                                       | 58.9<br>(53.5,64.8)    | 77.0<br>(68.6,86.4) | -18.1<br>(-25.2,-11.0) | 10.4<br>(7.4,14.5)                                     | 17.8<br>(13.5,23.3)  | -7.4<br>(-12.8,-2.0) | 10.8<br>(7.9,14.8)                   | 12.0<br>(9.9,14.5)  | -1.2<br>(-4.8, 2.5)   |
| Heterogeneously dense                                         |                        |                     |                        |                                                        |                      |                      |                                      |                     |                       |
| 0-<1.67%<br>(56810/185489)                                    | 96.3<br>(87.0,107)     | 107.7<br>(93.7,124) | -11.4<br>(-27.9, 5.1)  | 15.7<br>(12.9,19.1)                                    | 22.8<br>(17.8,29.3)  | -7.1<br>(-12.9,-1.3) | 16.3<br>(14.0,19.1)                  | 13.3<br>(10.7,16.5) | 3.0<br>(-0.56, 6.6)   |
| ≥1.67%<br>(66180/156785)                                      | 68.1<br>(62.1,74.7)    | 87.1<br>(73.9,103)  | -19.0<br>(-33.5,-4.5)  | 10.7<br>(7.8,14.5)                                     | 18.9<br>(14.8,24.2)  | -8.2<br>(-13.2,-3.2) | 11.8<br>(9.9,14.0)                   | 12.4<br>(9.8,15.7)  | -0.60<br>(-3.6, 2.4)  |
| Extremely dense                                               |                        |                     |                        |                                                        |                      |                      |                                      |                     |                       |
| 0-<1.67%<br>(10611/37796)                                     | 96.5<br>(92.2,101)     | 97.1<br>(84.5,112)  | -0.63<br>(-14.5,13.2)  | 19.2<br>(16.9, 21.8)                                   | 18.8<br>(14.2, 24.9) | 0.34<br>(-4.8,5.5)   | 17.7<br>(16.3,19.2)                  | 15.8<br>(13.4,18.6) | 1.9<br>(-0.87, 4.7)   |
| ≥1.67%<br>(13291/31300)                                       | 81.8<br>(70.6,94.8)    | 76.0<br>(69.1,83.6) | 5.8<br>(-8.3,19.9)     | 13.6<br>(11.7,15.7)                                    | 14.2<br>(11.0,18.4)  | -0.65<br>(-4.5,3.2)  | 15.7<br>(12.2,20.3)                  | 13.6<br>(11.0,16.9) | 2.1<br>(-2.7, 6.9)    |

<sup>a</sup>Based on log-binomial model fit via generalized estimating equations with inverse probability weighting

<sup>b</sup>Breast Cancer Surveillance Consortium (BCSC) 5-year risk calculated using age, race, first degree family history of breast cancer, history of breast biopsy, BI-RADS density
